# Supplementary material for: Effects of temperature fluctuations on spatial-temporal transmission of hand, foot, and mouth disease
Source: PubMed Central journal article supplement (PMC7018740; doi:10.1038/s41598-020-59265-z), 2020-02-13
Supplement: 41598_2020_59265_MOESM1_ESM.pdf [file 41598_2020_59265_MOESM1_ESM.pdf]

## Supplementary Information

### Title:

Effects of temperature fluctuations on spatial-temporal transmission of hand, foot, and mouth disease

### Author names and affiliations:

**Chengdong Xu<sup>1#</sup>, Xiangxue Zhang<sup>1,2#</sup>, Li Wang<sup>3,4</sup>, YukeZhou<sup>5</sup>, Gexin Xiao<sup>\*6,7</sup>, Jiaqiang Liao<sup>\*8</sup>**

<sup>1</sup>State Key Laboratory of Resources and Environmental Information System, Institute of Geographic Sciences and Natural Resources Research, Chinese Academy of Sciences, Beijing100101, China

<sup>2</sup> State Key Laboratory of Earth Surface Processes and Resource Ecology, Beijing Normal University, Beijing100875, China

<sup>3</sup>College of Environment and Planning, Henan University, KaiFeng475001, China.

<sup>4</sup>Key Laboratory of Geospatial Technology for the Middle and Lower Yellow River Regions (Henan University), Ministry of Education, Kai Feng 475001, China.

<sup>5</sup>Key Laboratory of Ecosystem Network Observation and Modeling, Institute of Geographic and Nature Resources Research, Chinese Academy of Sciences, Beijing 100101, China

<sup>6</sup>China National Center for Food Safety Risk Assessment, Beijing100022, China

<sup>7</sup>National Health Commission of the People's Republic of China, Beijing102206, China

<sup>8</sup>School of Public Health, Tongji Medical College, Huazhong University of Science and Technology, Wuhan430074, China

\*Correspondence and requests for materials should be addressed to G.X. (email: [biocomputer@126.com](mailto:biocomputer@126.com));J.L. (email:[ljq19861023@163.com](mailto:ljq19861023@163.com))

#Contributed equally.

**Table S1** Quantified posterior means and RR of coefficients in BSTHM of Beijing.

**Table S2** Quantified posterior means and RR of coefficients in BSTHM of Tianjin.

**Table S3** Quantified posterior means and RR of coefficients in BSTHM of Hebei province.

**Table S1** Quantified posterior means and RR of coefficients in BSTHM of Beijing.

| Variables                     | Posterior mean (95% CI) (%) | RR (95% CI)        |
|-------------------------------|-----------------------------|--------------------|
| SD of maximum temperature(°C) | 33.06** (5.74,60.77)        | 1.39 (1.06,1.84)   |
| SD of minimum temperature(°C) | -1.59 (-23.22,21.42)        | 0.98 (0.79,1.24)   |
| SD of average temperature(°C) | -19.30 (-59.66,20.35)       | 0.82 (0.55,1.23)   |
| Average temperature (°C)      | 9.31** (6.87,12.01)         | 1.10 (1.07,1.13)   |
| Relative humidity (%)         | 3.83** (2.26,5.79)          | 1.04 (1.02,1.06)   |
| Wind speed (m/s)              | 40.70** (10.52,70.18)       | 1.50 (1.11,2.02)   |
| Sun hours (h)                 | 0.54** (0.09,1.04)          | 1.005 (1.00,1.01)  |
| Precipitation (mm)            | -0.07 (-0.28,0.14)          | 0.999 (0.997,1.00) |

Note: 95% CI indicates confidence interval with a confidence level of 0.95,

\*\*statistical significance level: 0.01.

**Table S2** Quantified posterior means and RR of coefficients in BSTHM of Tianjin.

| Variables                     | Posterior mean (95% CI) (%) | RR (95% CI)       |
|-------------------------------|-----------------------------|-------------------|
| SD of maximum temperature(°C) | -10.09 (-69.92,53.49)       | 0.90 (0.50,1.71)  |
| SD of minimum temperature(°C) | -21.09 (-75.79,31.60)       | 0.81 (0.47,1.37)  |
| SD of average temperature(°C) | 47.59 (-52.18,142.00)       | 1.61 (0.59,4.14)  |
| Average temperature (°C)      | 11.21** (8.53,13.99)        | 1.12 (1.09,1.15)  |
| Relative humidity (%)         | 0.76 (-1.74,3.03)           | 1.01 (0.92,1.03)  |
| Wind speed (m/s)              | 27.97 (-8.95,65.05)         | 1.32 (0.91,1.92)  |
| Sun hours (h)                 | 0.07 (-0.49,0.59)           | 1.00 (0.99,1.01)  |
| Precipitation (mm)            | 0.62** (0.29,0.95)          | 1.006 (1.00,1.01) |

Note: 95% CI indicates confidence interval with a confidence level of 0.95,

\*\*statistical significance level: 0.01.

**Table S3** Quantified posterior means and RR of coefficients in BSTHM of Hebei province.

| Variables                     | Posterior mean (95% CI) (%) | RR (95% CI)        |
|-------------------------------|-----------------------------|--------------------|
| SD of maximum temperature(°C) | -6.45 (-19.78,5.94)         | 0.94 (0.82,1.06)   |
| SD of minimum temperature(°C) | -8.92 (-22.80,3.67)         | 0.91 (0.80,1.04)   |
| SD of average temperature(°C) | 1.85 (-16.90,22.53)         | 1.02 (0.84,1.25)   |
| Average temperature (°C)      | 19.95** (17.72,22.33)       | 1.22 (1.19,1.25)   |
| Relative humidity (%)         | 4.25** (3.71,5.04)          | 1.04 (1.03,1.05)   |
| Wind speed (m/s)              | -26.27** (-38.23,-14.29)    | 0.77 (0.68,0.87)   |
| Sun hours (h)                 | 0.02 (-0.13,0.16)           | 1.00 (0.999,1.002) |
| Precipitation (mm)            | -0.19** (-0.27,-0.11)       | 0.998 (0.997,1.00) |

Note: 95% CI indicates confidence interval with a confidence level of 0.95,

\*\* statistical significance level: 0.01.
